# Supplementary material for: Comparison of Prevalence of Synovitis by Ultrasound Assessment in Subjects Exposed or Not to Self-Reported Physical Overexertion: The Monday’s Synovitis
Source: Hindawi journal article supplement (doi:10.1155/2014/563981), 2014-01-01
Supplement: f1 [file 563981.f1.pdf]

**ESTUDIO SOBRE EL EFECTO DE LA ACTIVIDAD FISICA EN LA VALORACION  
ECOGRAFICA DE SUJETOS SIN ENFERMEDADES REUMATOLOGICAS  
AUTOINMUNES**

**CUESTIONARIO – ACTIVIDAD FISICA**

De acuerdo con los principios éticos de investigación científica que se encuentran vigentes, la información que usted aporte en este cuestionario será utilizada sola y exclusivamente para los propósitos del estudio cuyo título se señala arriba.

Fecha de realización del estudio: \_\_ / \_\_ / \_\_\_\_

**Datos de filiación**

Nombre \_\_\_\_\_ Fecha de nacimiento: \_\_ / \_\_ / \_\_\_\_  
Sexo: \_\_\_\_\_

Mano dominante: Diestro ☐ Zurdo ☐ Ambidiestro ☐

**¿Cuál es su situación laboral?**

Desempleado ☐ Pensionista ☐ Trabajador activo ☐

---

En caso de ser trabajador activo continúe con el cuestionario. En caso contrario considere terminado el presente cuestionario.

***Las siguientes preguntas se refieren a la actividad que realiza usted de forma habitual a lo largo de la semana, de lunes a viernes.***

¿Qué grado de actividad física realiza usted como parte de su actividad laboral?

☐ Ninguno o casi ninguno. Mi actividad laboral es prácticamente sedentaria.

☐ Intermedia. Alterno periodos de sedentarismo con periodos de actividad física.

☐ Mi trabajo es fundamentalmente físico.

¿Realiza usted deporte de forma habitual a lo largo de la semana? (Considera habitual, 2 o más veces por semana).

Si ☐ No ☐

---

***Las siguientes preguntas se refieren a las actividades que usted realizó a lo largo del día de ayer (Desde que se levantó de la cama hasta que se acostó).***

¿Realizó usted alguna actividad física distinta a las que realiza habitualmente? Esto incluye deporte que no realice habitualmente o trabajo que no realice habitualmente.

Si ☐ No ☐

La actividad física que realizó incluye el uso de las manos?

Si ☐ No ☐

En caso de haber respondido que si, ¿considera usted que la actividad que ha realizado es de mayor intensidad a la que habitualmente realiza a lo largo de la semana?

Si ☐ No ☐

En caso de haber respondido que si, ¿considera que la actividad que ha realizado usted es al menos un 50% más intensa que la que habitualmente realiza a lo largo de la semana?

Si ☐ No ☐
